# Supplementary material for: Study protocol for a systematic review of evidence for lifestyle interventions targeting smoking, sleep, alcohol/other drug use, physical activity, and healthy diet in people with bipolar disorder
Source: Springer Nature journal article supplement (doi:10.1186/s13643-016-0282-9), 2016-07-05
Supplement: MOESM1 [file 10340736]

## Study Details

Study ID:

Reviewer initials:

First author surname, initial:

Year of publication:

Journal name:

## Methods (20)

Study design:

Study setting:

Sample Size:

Study population:

Intervention target:

(tobacco, physical activity, diet quality, sleep-wake disturbance, alcohol, cannabis, illicit drug)

Type of intervention:

**SELECTION BIAS** (low, unclear, high):

Random sequence generation:

Allocation concealment:

**PERFORMANCE BIAS** (low, unclear, high):

Blinding of participants and personnel:

**DETECTION BIAS** (low, unclear, high):

Blinding of outcome assessment:

Mode of outcome assessment:

**ATTRITION BIAS** (low, unclear, high):

Approached =

Eligible =

Consented =

Baseline =

Intervention completion rates =

Follow-up 1 =

Follow-up 2 =

Follow-up 3 =

Incomplete outcome data short term?

Incomplete outcome data long term?

**Results (20)**

**REPORTING BIAS** (low, unclear, high):

Primary outcome, incl. endpoint:

Other outcomes, incl. endpoint:

Phase of bipolar disorder for participants at recruitment:

Age at baseline:

Gender split:

**PRIMARY OUTCOME:**

Data analysis approach:

Management of missing data:

Statistical results – Coefficient:

95% CI:

p-value:

Adjusted for:

**OTHER OUTCOMES:** (detail)

Statistical results – Coefficient:

95% CI:

p-value:

Adjusted for:

**OTHER OUTCOMES:** (detail, and add as necessary)

Statistical results – Coefficient:

95% CI:

p-value:

Adjusted for:

Multiple health behavior outcomes reported? (Y/N)

Details of multiple health behavior outcomes:

Medication side effects reported: (detail)

Patient acceptability reported: (detail)

Main/Additional Findings:

Study limitations:

Selective outcome reporting? (rating A-I):

(as per ORBIT classification system, 21)
